# Supplementary material for: Oral Phage Therapy of Acute Bacterial Diarrhea With Two Coliphage Preparations: A Randomized Trial in Children From Bangladesh
Source: PubMed Central journal article supplement — eBioMedicine. 2016 Jan 5;4:124–37. doi: 10.1016/j.ebiom.2015.12.023 (PMC4776075; doi:10.1016/j.ebiom.2015.12.023), 2016-01-05
Supplement: mmc2.pdf [file mmc2.pdf]

**Suppl. Table 1** Genome sequencing of fecal *Streptococcus* isolates

| Strain code | Taxonomy                             | Coverage | contig nb | max contig length [Mb] | sum contigs [Mb] | Consensus Concordance | comment       |
|-------------|--------------------------------------|----------|-----------|------------------------|------------------|-----------------------|---------------|
| SgS1        | <i>Streptococcus gallolyticus S1</i> | 173x     | 1         | 2.05                   | 2.05             | 99.9997               | sick child    |
| SgS3        | <i>Streptococcus gallolyticus S3</i> | 176x     | 2         | 1.8                    | 2.13             | 99.9991               | sick child    |
| SiS5        | <i>Streptococcus infantarius N2</i>  | 163x     | 1         | 1.81                   | 1.81             | 99.9997               | sick child    |
| SbS6        | <i>Streptococcus bovis N1</i>        | 110x     | 3         | 1.5                    | 1.85             | 99.9985               | healthy child |

**Suppl. Table 2** Borderline difference in fecal microbiota composition between placebo and phage recipients T, but not M in the acute phase of proven ETEC diarrhea

| Comparison | Day_of hospitalization | No of samples | P (Permanova) | R <sup>2</sup> ; Explained variance |
|------------|------------------------|---------------|---------------|-------------------------------------|
| P vs. M    | D1                     | 11;9          | 0.38          |                                     |
|            | D2                     | 11;9          | 0.55          |                                     |
|            | D3                     | 11;9          | 0.99          |                                     |
|            | D4                     | 11;7          | 0.08          |                                     |
|            | D5                     | 7;4           | 0.13          |                                     |
|            | D21                    | 7;7           | 0.74          |                                     |
| P vs. T    | D1                     | 11;10         | <b>0.05</b>   | 17%                                 |
|            | D2                     | 11;9          | <b>0.05</b>   | 24%*                                |
|            | D3                     | 11;10         | 0.13          |                                     |
|            | D4                     | 11;9          | 0.37          |                                     |
|            | D5                     | 7;4           | 0.96          |                                     |
|            | D21                    | 7;7           | 0.31          |                                     |

\*difference contributed by *Bifidobacterium* and *Streptococcus* as shown by LEfSe analysis

**Supplementary Table 3** Candidate virulence genes in *S. lutetiensis* strain 0033 and *S. infantarius* strain S5

| Strain 0033 gene number | Present in S5 | Annotation in 0033 (Jin et al. 2013)   | Alternative comments                               |
|-------------------------|---------------|----------------------------------------|----------------------------------------------------|
| KE3_0855                | -             | Pilin gene inverting-related protein   |                                                    |
| KE3_0863                | -             | Pilin gene inverting-related protein   |                                                    |
| KE3_0878                | -             | Pilin gene inverting-related protein   |                                                    |
| KE3_0857                | -             | Putative laminin adhesion              |                                                    |
| KE3_0728                | +             | Fibronectin/fibrinogen binding protein | dihydroorotate dehydrogenase                       |
| KE3_1942                | +             | Putative pilus subunit protein         | No domain detected                                 |
| KE3_1943                | +             | Putative pilus subunit protein         | LPTXG cell wall anchor                             |
| KE3_1766                | +             | Sortase A                              |                                                    |
| KE3_1047                | +             | Exfoliative toxin A/B                  | Tellurite resistance/<br>dicarboxylate transporter |
| KE3_0590                | +             | Hemolysin A                            | Cell division protein FtsJ                         |
| KE3_1574                | +             | Hemolysis inducing protein             | SdpI multipass integral membrane protein           |
| KE3_1645                | +             | Putative hemolysin                     | Mg <sup>2+</sup> /Co <sup>2+</sup> transporter     |
| KE3_1380                | +             | Putative surface adhesion              | ABC-type Zn <sup>2+</sup> transporter              |

**Supplementary Table 4** Dirichlet Multinomial Mixtures analysis parameters describing the weights of each partition ( $\pi$ ) and the variability of the communities in each partition ( $\theta$ ). A low  $\theta$  means a high variability

| <b>Partition</b> | <b><math>\theta</math></b> | <b><math>\pi</math></b> |
|------------------|----------------------------|-------------------------|
| <b>P1</b>        | 5.6869                     | 0.11                    |
| <b>P2</b>        | 12.7678                    | 0.2                     |
| <b>P3</b>        | 9.0694                     | 0.29                    |
| <b>P4</b>        | 2.3953                     | 0.41                    |

**Supplementary Table 5** Genera frequencies of the Dirichlet Multinomial Mixtures analysis

| Rank | All  | P1                      | P2                      | P3                       | P4                      | Percentage Difference | Cumulative Fraction | Genus                   |
|------|------|-------------------------|-------------------------|--------------------------|-------------------------|-----------------------|---------------------|-------------------------|
| 1    | 40.2 | 33.8- <b>46.6</b> -64.3 | 44.1- <b>58.2</b> -76.8 | 66.2- <b>90.6</b> -124.1 | 12.8- <b>16.0</b> -20.1 | 37                    | 37                  | <i>Bifidobacterium</i>  |
| 2    | 31.7 | 11.0- <b>16.0</b> -23.2 | 26.0- <b>34.4</b> -45.4 | 02.9- <b>04.0</b> -05.4  | 53.5- <b>68.5</b> -87.7 | 31                    | 68                  | <i>Streptococcus</i>    |
| 3    | 05.0 | 01.1- <b>02.1</b> -03.8 | 00.5- <b>00.8</b> -01.4 | 00.9- <b>01.3</b> -01.9  | 03.6- <b>04.9</b> -06.6 | 4                     | 72                  | <i>Escherichia</i>      |
| 4    | 01.9 | 05.3- <b>07.7</b> -11.3 | 00.2- <b>00.4</b> -00.8 | 00.1- <b>00.2</b> -00.5  | 00.1- <b>00.3</b> -00.8 | 4                     | 76                  | <i>Dorea</i>            |
| 5    | 01.9 | 04.0- <b>06.0</b> -09.2 | 00.1- <b>00.2</b> -00.5 | 00.1- <b>00.3</b> -00.6  | 00.4- <b>00.8</b> -01.5 | 3                     | 79                  | <i>Blautia</i>          |
| 6    | 03.7 | 01.0- <b>01.8</b> -03.4 | 01.4- <b>02.0</b> -02.9 | 00.8- <b>01.2</b> -01.8  | 00.7- <b>01.2</b> -02.0 | 3                     | 82                  | <i>Lactobacillus</i>    |
| 7    | 02.4 | 02.2- <b>03.6</b> -05.7 | 00.5- <b>00.8</b> -01.4 | 00.4- <b>00.6</b> -01.0  | 00.2- <b>00.4</b> -01.0 | 2                     | 85                  | <i>Collinsella</i>      |
| 8    | 02.1 | 00.8- <b>01.6</b> -03.1 | 00.4- <b>00.7</b> -01.2 | 00.3- <b>00.5</b> -00.9  | 00.6- <b>01.1</b> -01.9 | 2                     | 86                  | <i>Enterococcus</i>     |
| 9    | 00.6 | 01.2- <b>02.1</b> -03.8 | 00.0- <b>00.0</b> -01.1 | 00.0- <b>00.1</b> -00.3  | 00.0- <b>00.0</b> -04.3 | 1                     | 88                  | <i>Ruminococcus</i>     |
| 10   | 00.7 | 01.1- <b>01.9</b> -03.5 | 00.0- <b>00.1</b> -00.4 | 00.0- <b>00.1</b> -00.3  | 00.0- <b>00.1</b> -00.6 | 1                     | 89                  | <i>Faecalibacterium</i> |

Percentage relative abundance of the first 10 out of 35 genera in the estimate of the mean of the reference single Dirichlet component, All; and the four Dirichlet mixture components, P1-P4 fitted to the Twins data. For the mixture components the upper and lower 95% credible intervals are also given in the format (lower-**estimate** (in bold)-upper). Genera are ranked in order of their contribution to the total mean difference to the reference across components, Percentage Difference. The cumulative fraction of this difference accounted for is also given.
